# Supplementary material for: Hillslope subsurface flow is driven by vegetation more than soil properties in colonized valley moraines along a humid mountain elevation
Source: Copernicus journal article supplement (doi:10.5194/egusphere-2025-1254), 2025-05-05
Supplement: Supplementary file 1 [file egusphere-2025-1254-supplement.pdf]

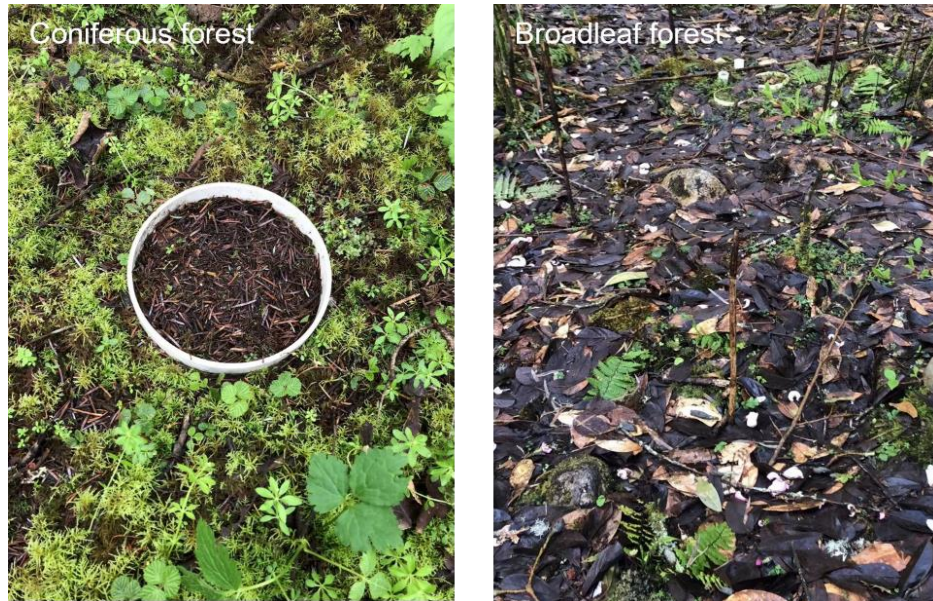

**Figure S1.** Forest ground layer in the coniferous forest (left) and the broadleaf forest (right). (Moss inside the white circle was excluded to better present the litter of the coniferous forest)

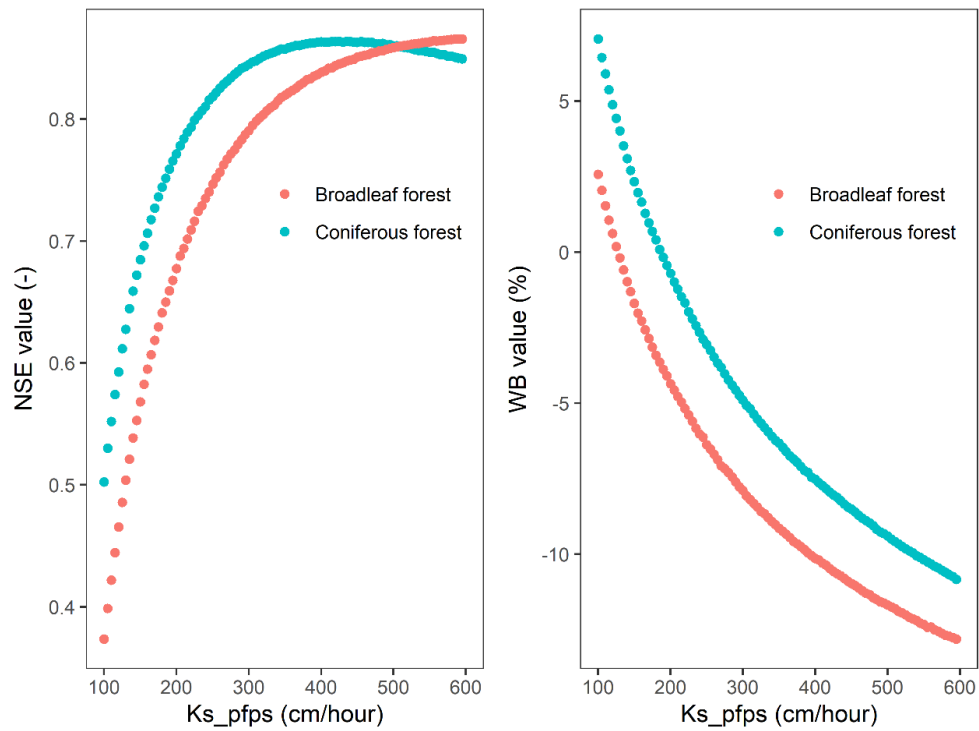

**Figure S2.** Sensitivity analysis of saturated hydraulic conductivity of PFPs (Ks\_pfps) to NSE and WB at event scale.

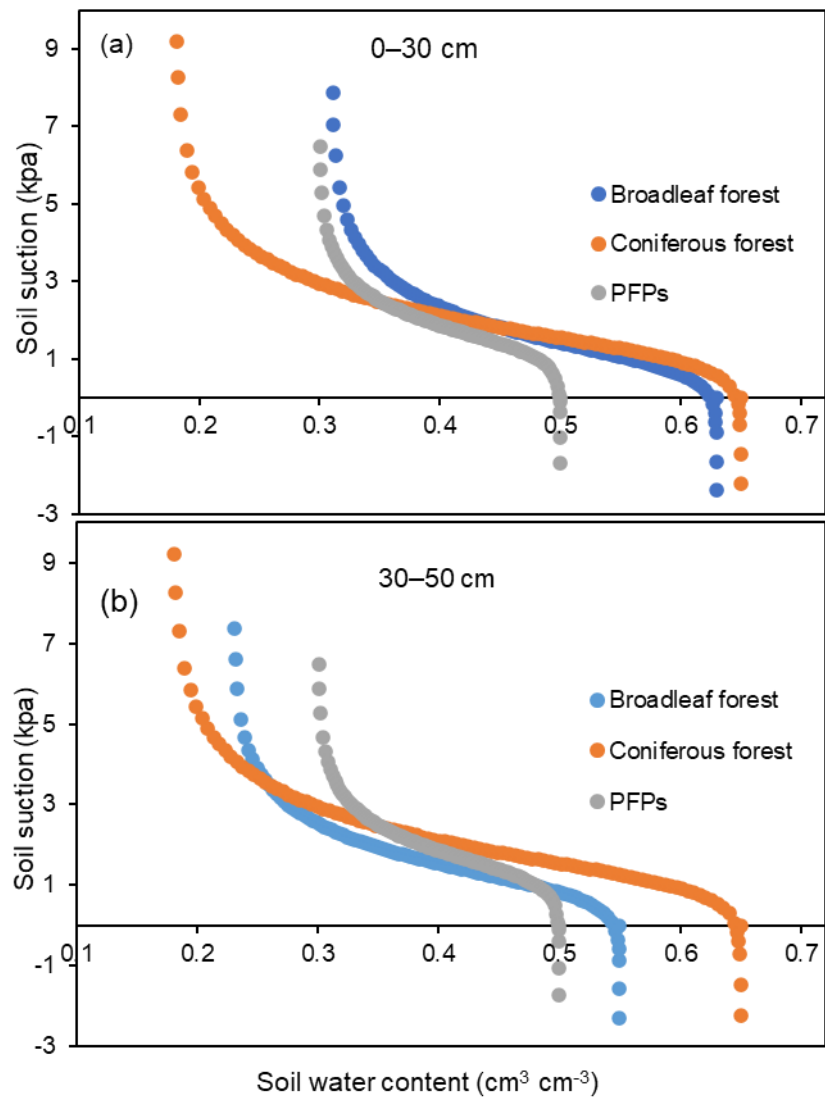

**Figure S3.** Water retention curve of the soil and the PFPs in different depths and forest types.

Table S1. Time and corresponding volume of peak flow in sequence at event scale.

| Set-ups  | Coniferous forest    |                      |                      |                                     |                                     |                                     | Broadleaf forest     |                      |                      |                                     |                                     |                                     |
|----------|----------------------|----------------------|----------------------|-------------------------------------|-------------------------------------|-------------------------------------|----------------------|----------------------|----------------------|-------------------------------------|-------------------------------------|-------------------------------------|
|          | 1 <sup>st</sup> peak | 2 <sup>nd</sup> peak | 3 <sup>rd</sup> peak | 1 <sup>st</sup> peak                | 2 <sup>nd</sup> peak                | 3 <sup>rd</sup> peak                | 1 <sup>st</sup> peak | 2 <sup>nd</sup> peak | 3 <sup>rd</sup> peak | 1 <sup>st</sup> peak                | 2 <sup>nd</sup> peak                | 3 <sup>rd</sup> peak                |
|          | time                 | time                 | time                 | amount                              | amount                              | amount                              | time                 | time                 | time                 | amount                              | amount                              | amount                              |
|          | (hr)                 | (hr)                 | (hr)                 | (cm <sup>2</sup> hr <sup>-1</sup> ) | (cm <sup>2</sup> hr <sup>-1</sup> ) | (cm <sup>2</sup> hr <sup>-1</sup> ) | (hr)                 | (hr)                 | (hr)                 | (cm <sup>2</sup> hr <sup>-1</sup> ) | (cm <sup>2</sup> hr <sup>-1</sup> ) | (cm <sup>2</sup> hr <sup>-1</sup> ) |
| LV-LbL   | 14.11                | 32.99                | 61.72                | 9.30                                | 46.37                               | 44.90                               | 13.15                | 32.51                | 61.31                | 11.00                               | 54.59                               | 47.70                               |
| LV-LL    | 13.62                | 32.81                | 61.23                | 11.50                               | 48.16                               | 44.94                               | 13.23                | 32.44                | 61.23                | 13.81                               | 55.20                               | 47.03                               |
| LV-ML    | 14.62                | 33.26                | 62.19                | 12.95                               | 52.50                               | 44.39                               | 13.74                | 33.75                | 62.21                | 15.10                               | 61.37                               | 47.03                               |
| Mean     | <b>14.12</b>         | <b>33.02</b>         | <b>61.71</b>         | <b>11.25</b>                        | <b>49.01</b>                        | <b>44.74</b>                        | <b>13.37</b>         | <b>32.9</b>          | <b>61.58</b>         | <b>13.30</b>                        | <b>57.05</b>                        | <b>47.25</b>                        |
| LV-LbL-G | 12.48                | 31.00                | 60.31                | 16.81                               | 64.03                               | 53.33                               | -                    | -                    | -                    | -                                   | -                                   | -                                   |
| LV-LL-G  | 9.65                 | 31.13                | 60.15                | 19.49                               | 62.98                               | 53.13                               | 9.18                 | 31.23                | 60.23                | 23.45                               | 67.13                               | 54.55                               |
| LV-ML-G  | 9.50                 | 31.51                | 60.54                | 23.54                               | 65.80                               | 51.21                               | 9.40                 | 31.48                | 60.38                | 24.39                               | 63.91                               | 51.18                               |
| Mean     | <b>10.54</b>         | <b>31.21</b>         | <b>60.33</b>         | <b>19.95</b>                        | <b>64.27</b>                        | <b>52.56</b>                        | <b>9.29</b>          | <b>31.36</b>         | <b>60.31</b>         | <b>23.92</b>                        | <b>65.52</b>                        | <b>52.87</b>                        |
